# Supplementary material for: Practical approach to archival and retrieval of analytical data in the laboratory
Source: Royal Society of Chemistry journal article supplement (doi:10.1039/b102017j), 2001-01-01
Supplement: database.pdf [file database.pdf]

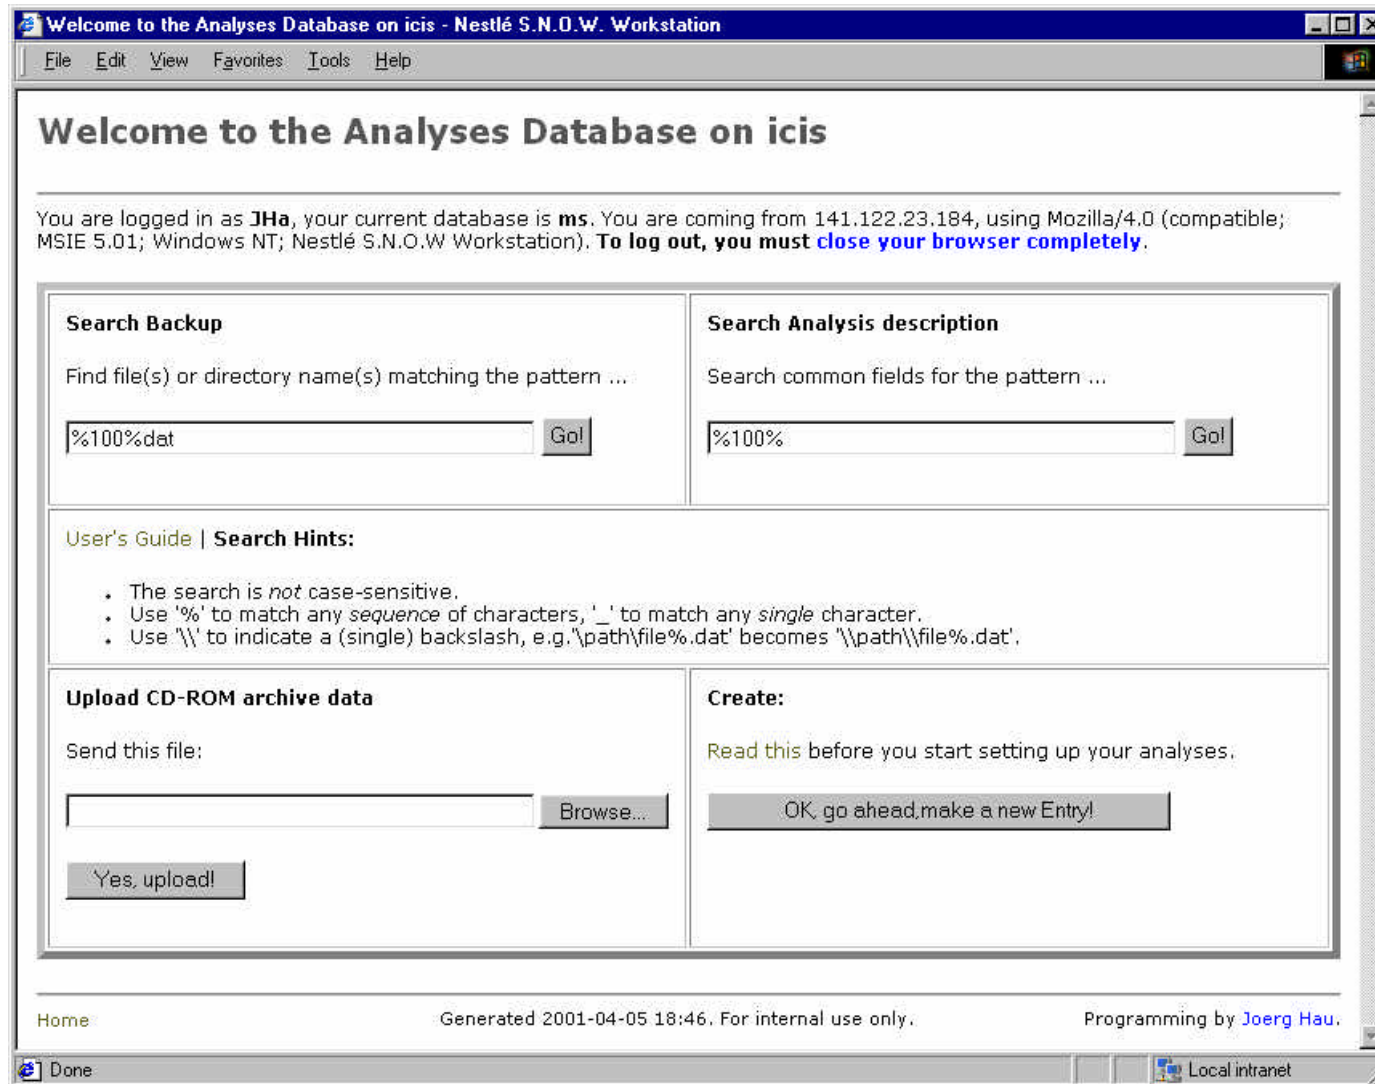

"Screenshot" of the opening screen of the database.

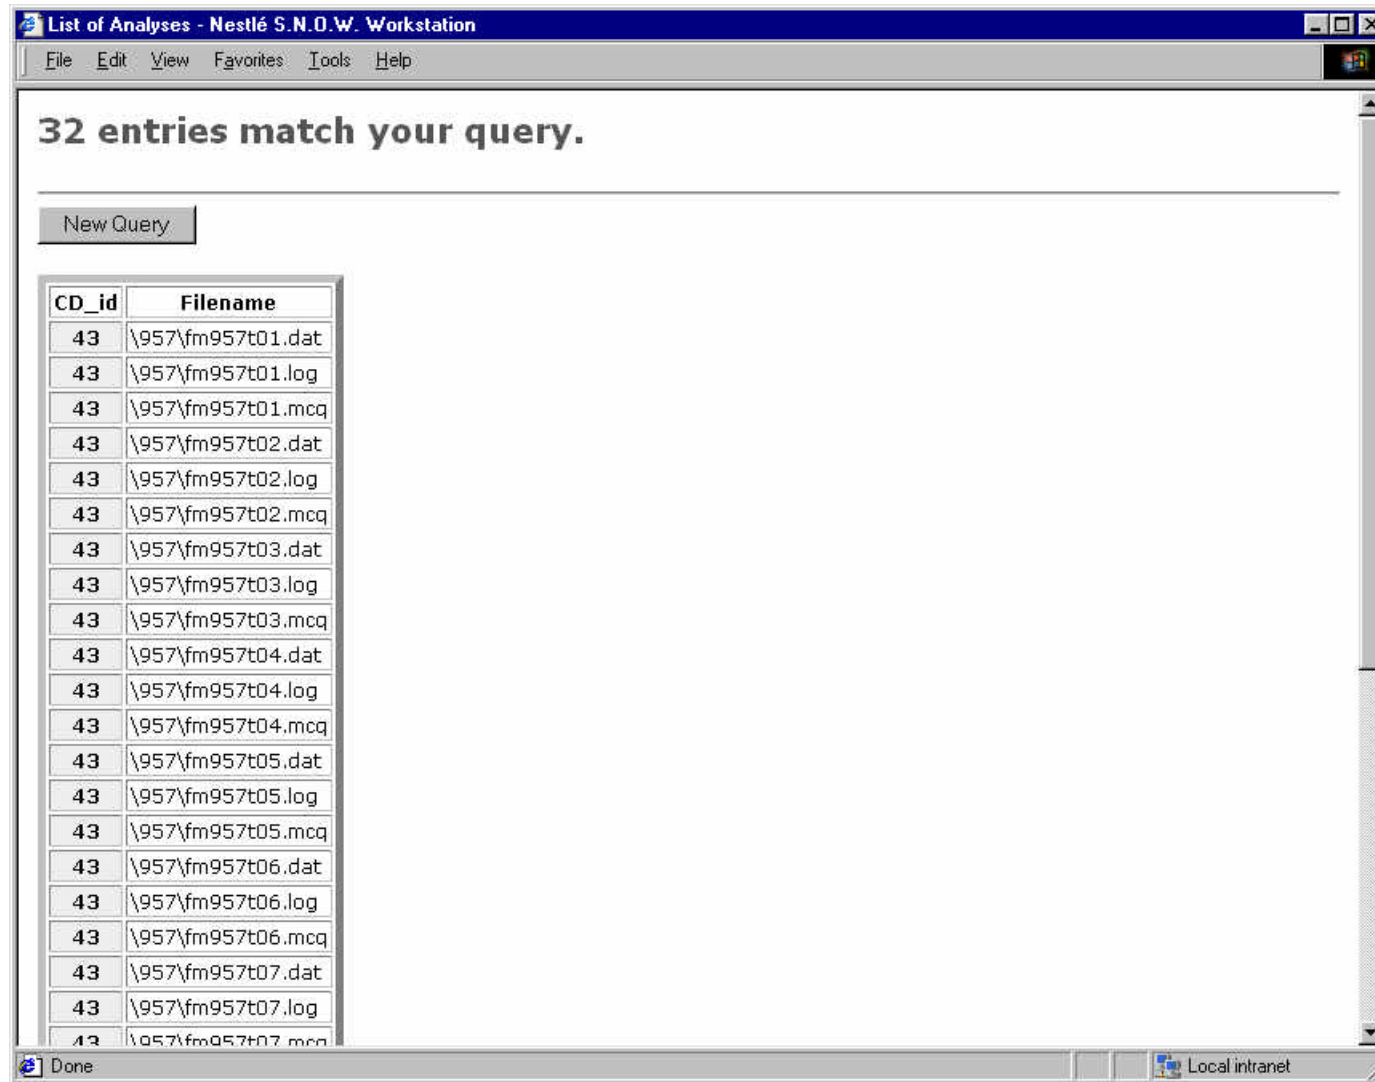

"Screenshot" of the Backup list for fm957, as retrieved from the database.

**File Code: fm957**  
Project: Peptide ...  
Analyst: J. Hau  
Submitter: FM  
Description: ...  
Instrument  
...

Analysis Information

...  
\956\jh956t01  
\956\jh956t02  
\956\jh956t03  
**\957\fm957t01**  
**\957\fm957t02**  
**\957\fm957t03**  
**\957\fm957k01**  
**\957\fm957k02**  
\958\tk958m01  
\958\tk958m02  
...

Backup List

Relation between the name of a file, the study code and the backup list.  
The example shows retrieval of information from two different instruments, 't' and 'k'.

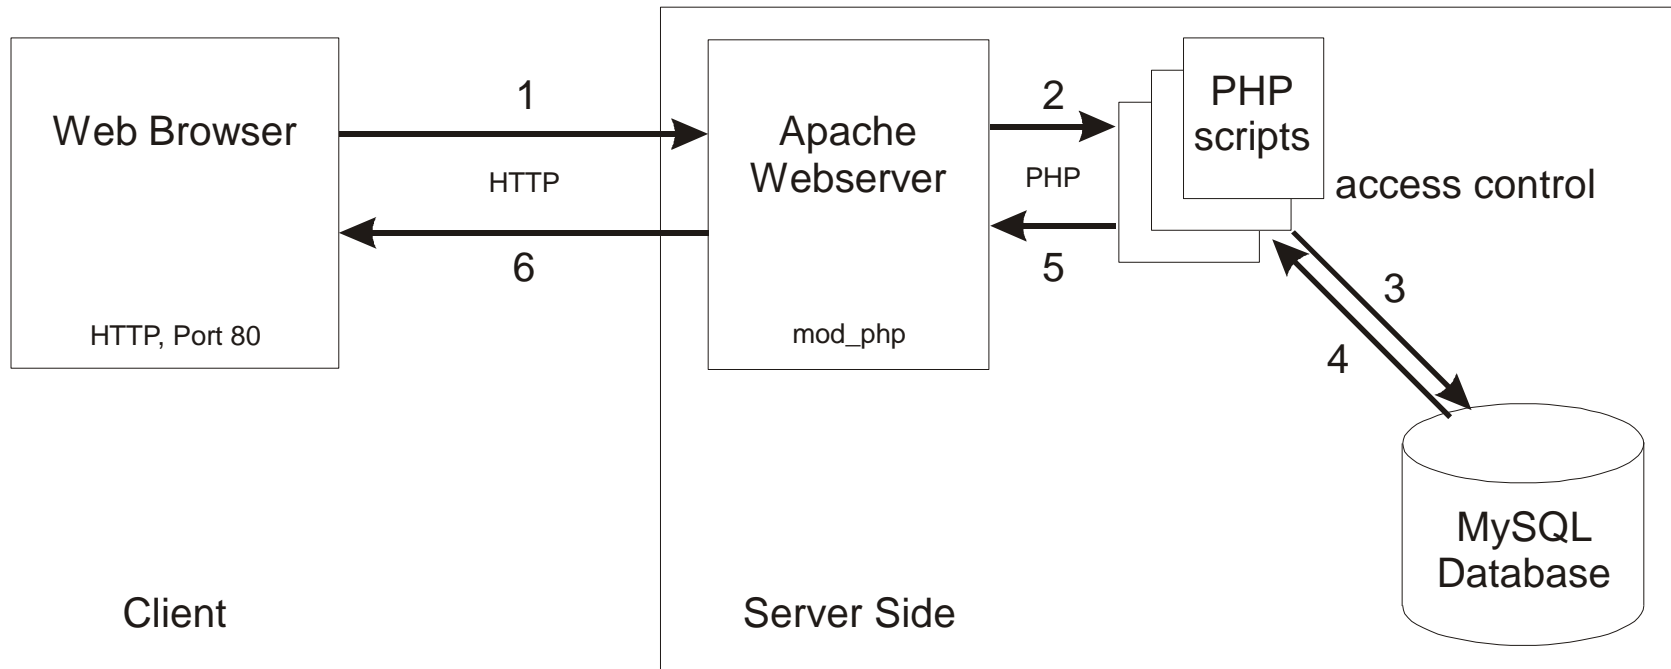

Functional overview over the interaction between web browser, web server, php scripting and MySQL database engine.
